# Supplementary material for: Interpreting the Dependence of Mutation Rates on Age and Time
Source: PLOS journal article supplement (doi:10.1371/journal.pbio.1002355), 2016-01-13

**A**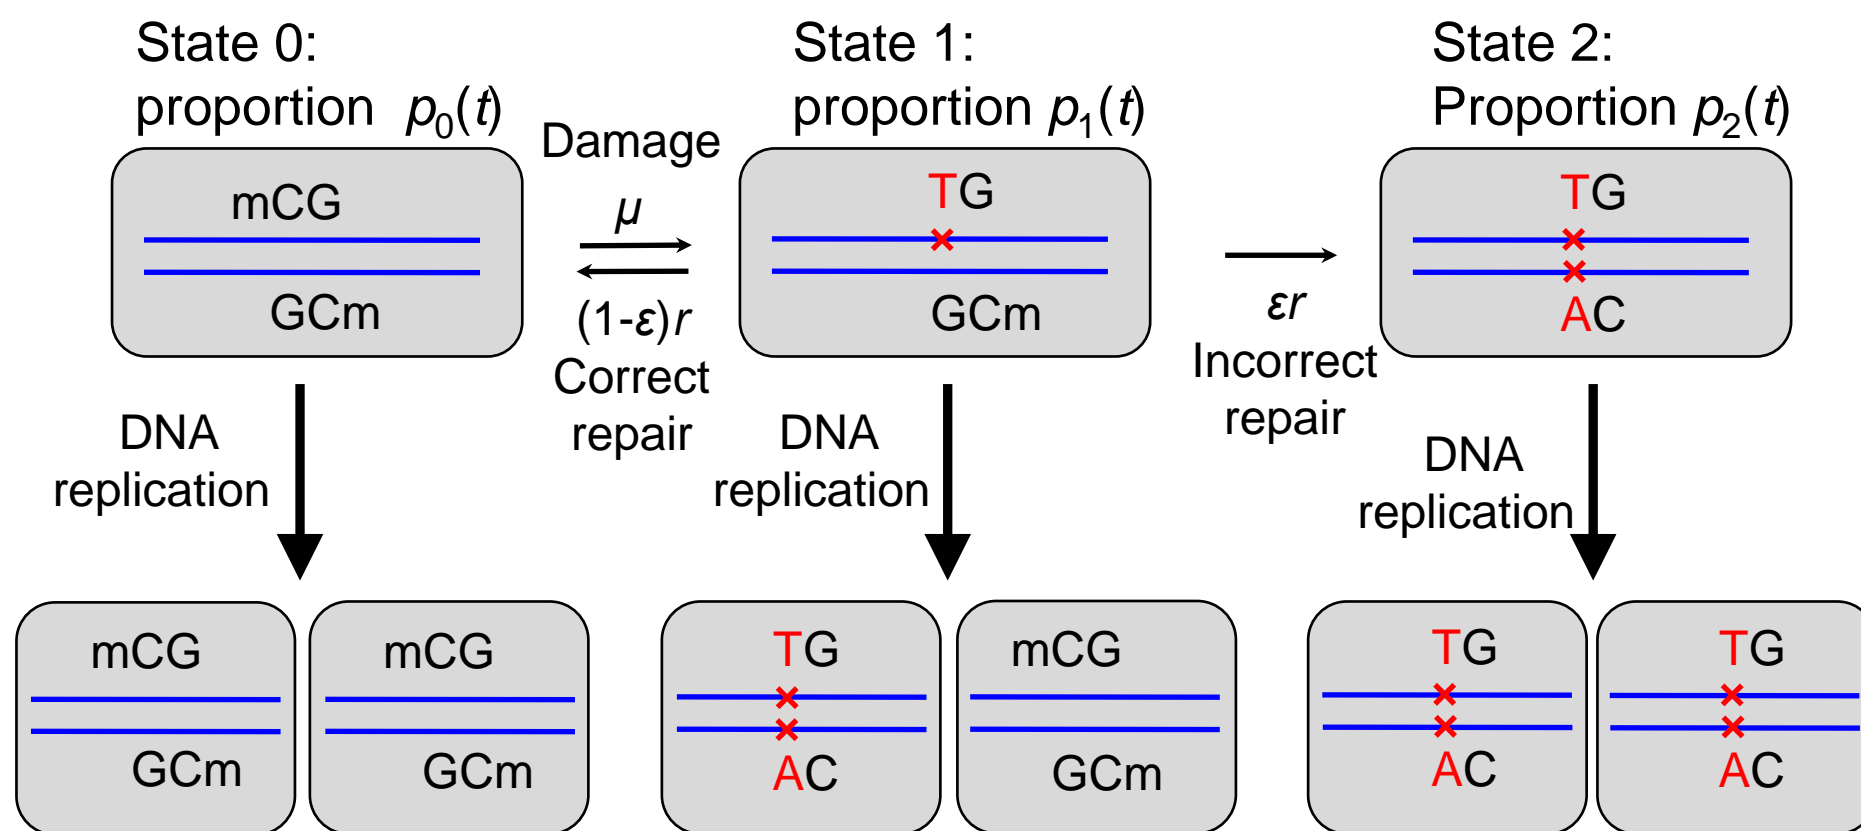**B**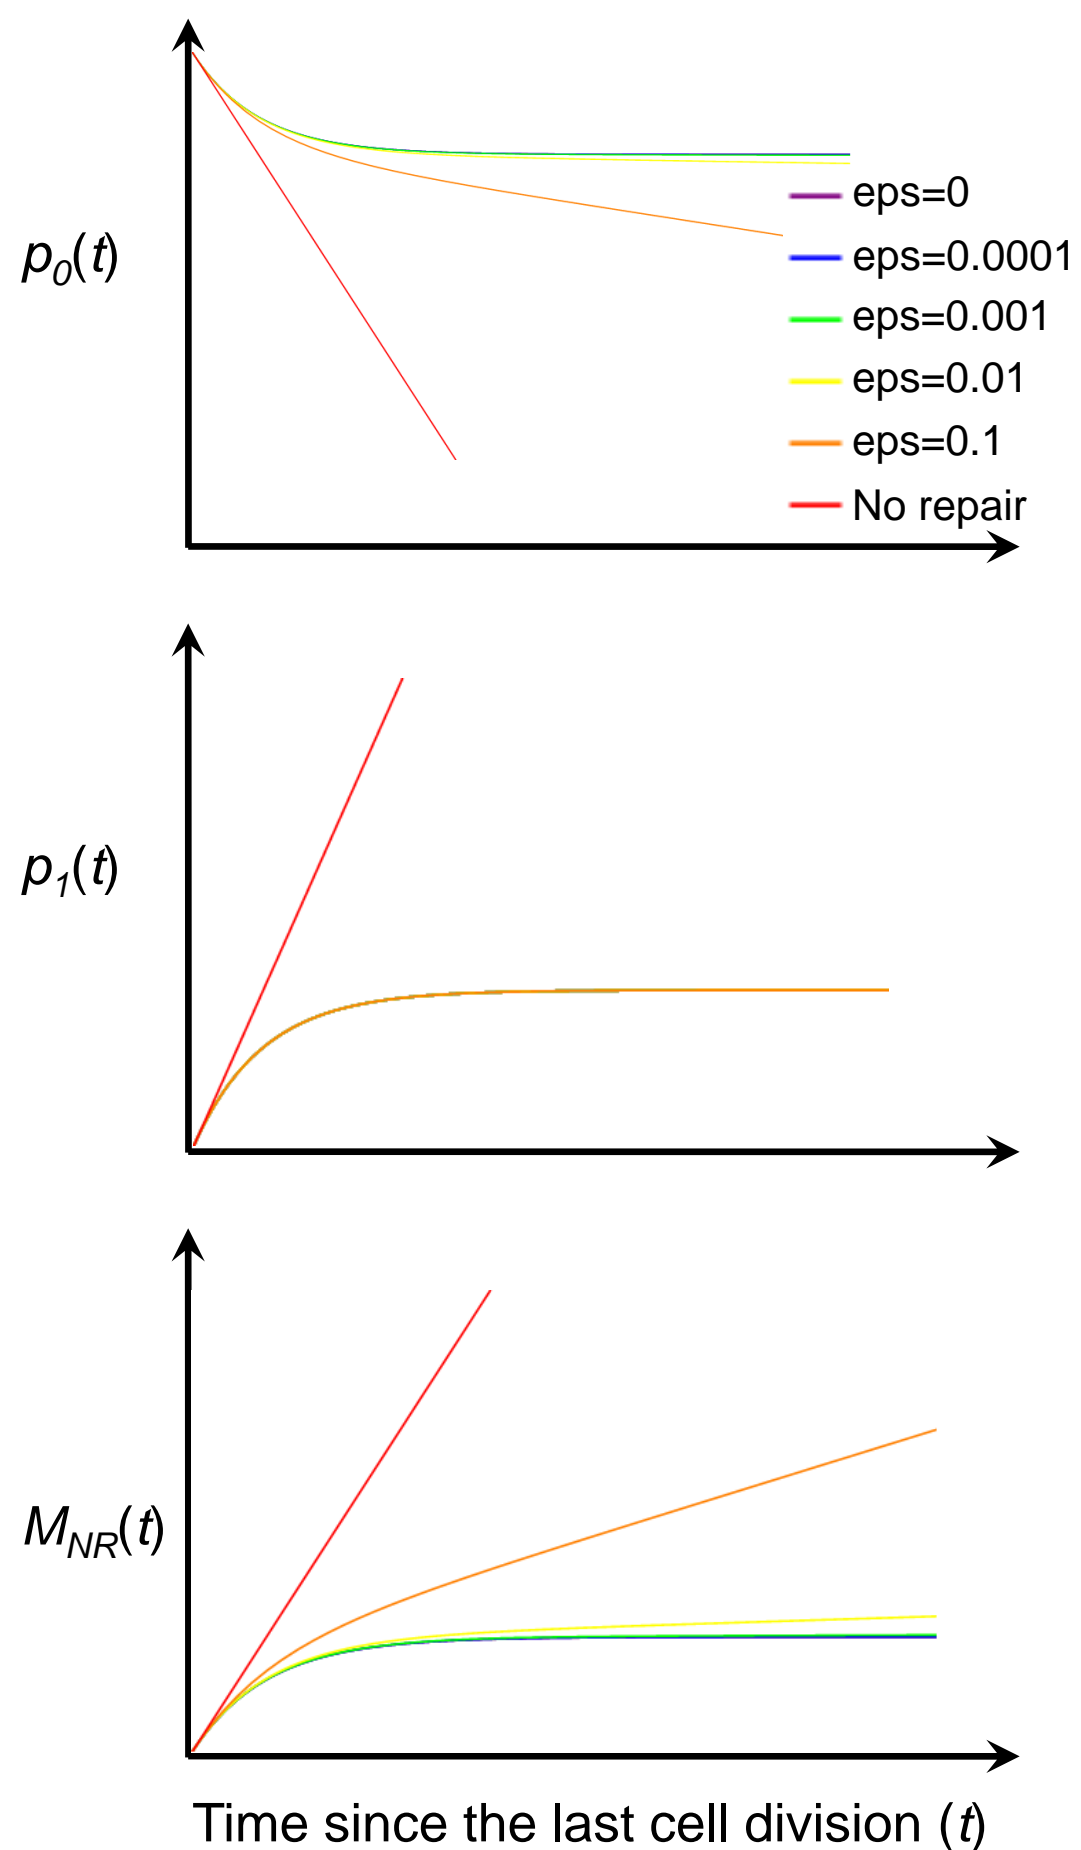**C**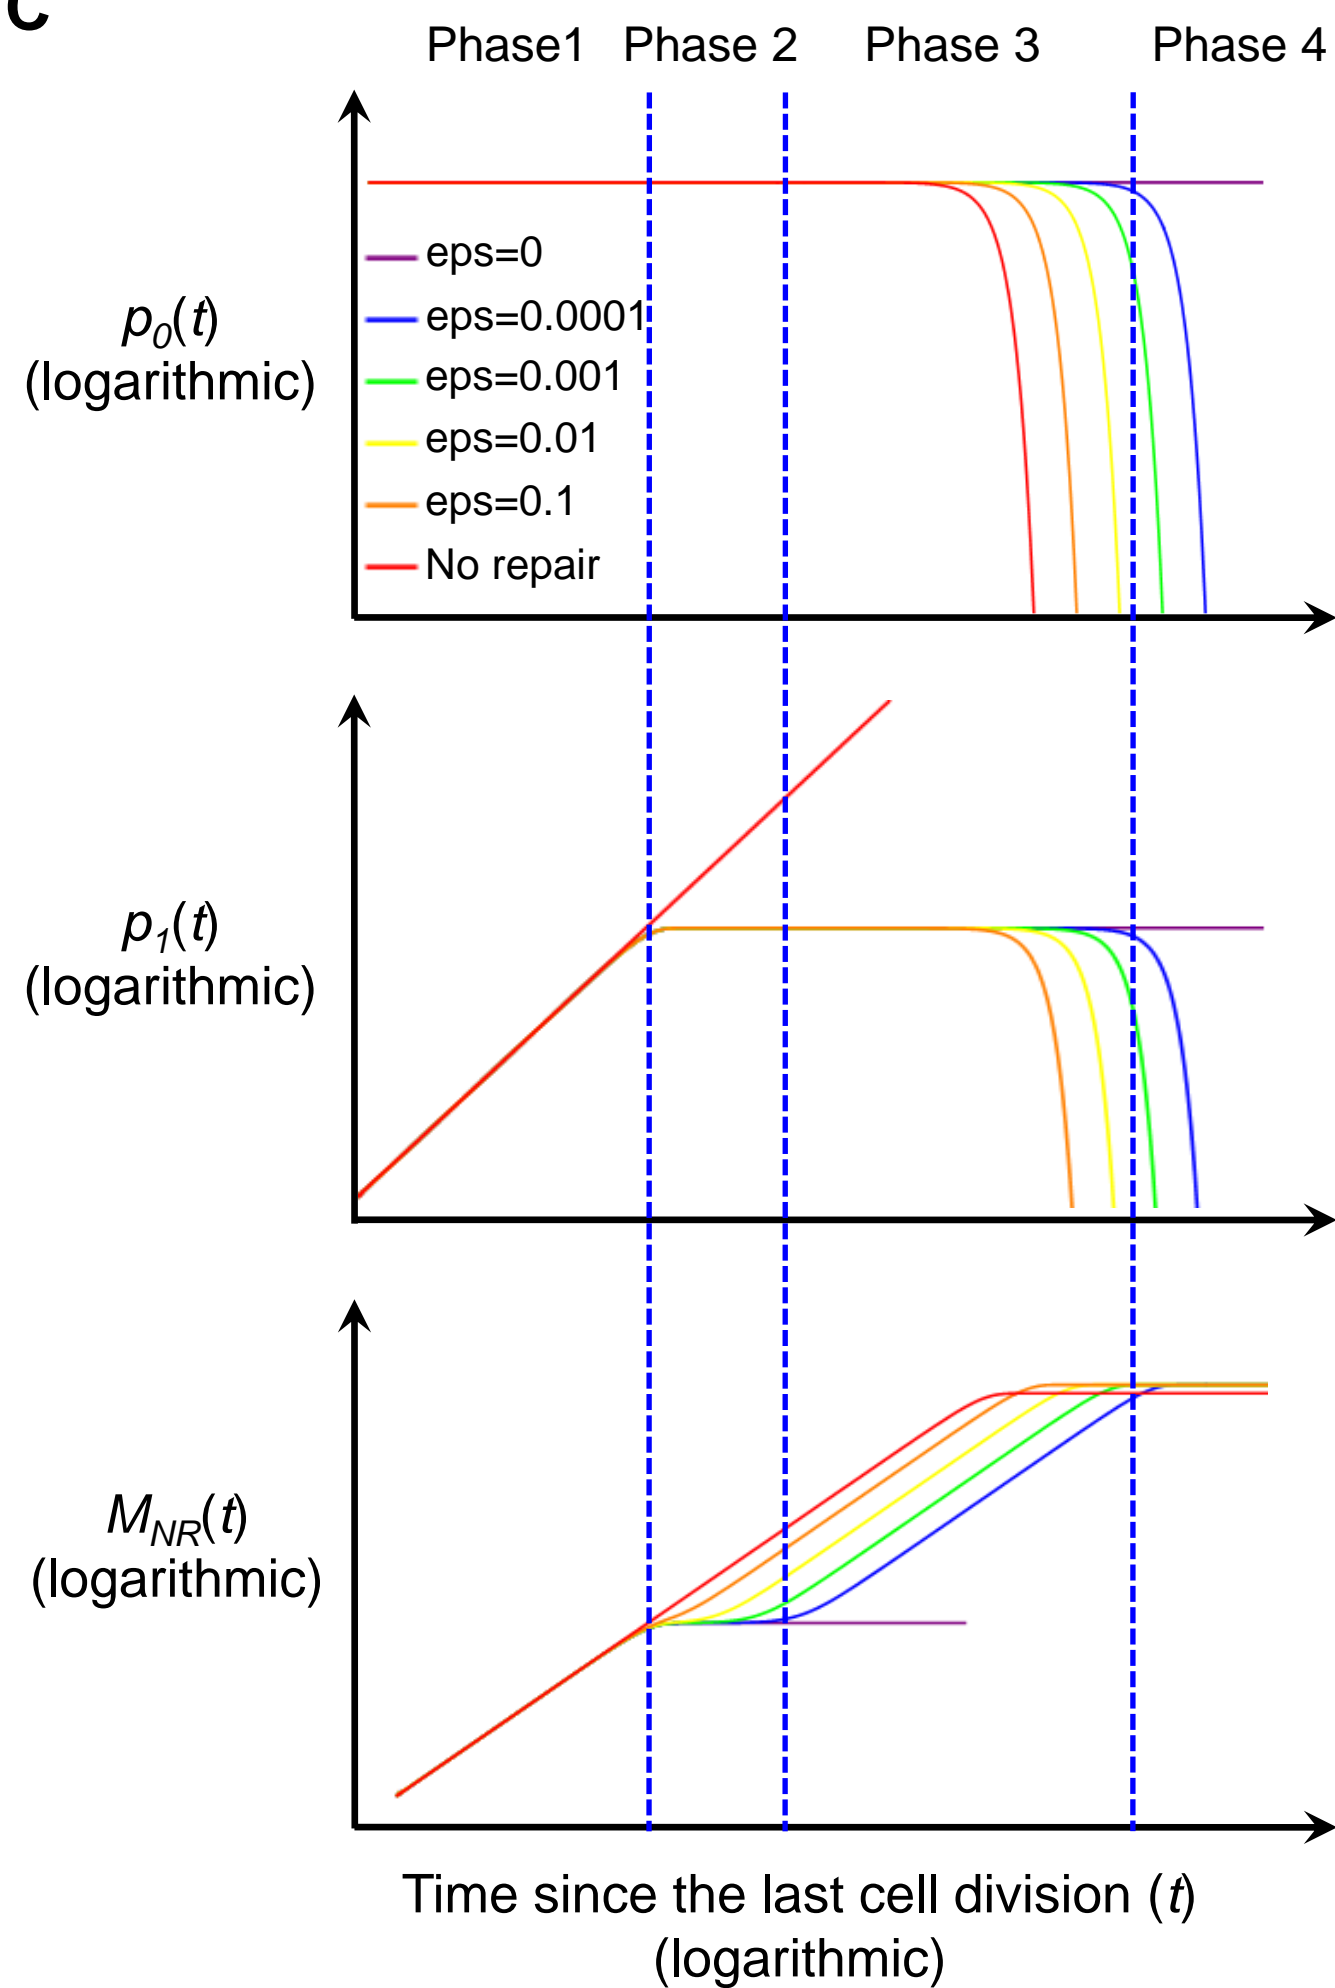

Supplement: S1 (10.1371/journal.pbio.1002355.s001) [file journal.pbio.1002355.s001]
